# Supplementary material
Source: publisher figshare collection journal article supplement (https://tandf.figshare.com/articles/dataset/_/9976124)
Supplement: Supplementary file 3 [file 2]

Archive with 4 entries (4 files):
- iiht_a_960106_sm7854.pdf
- iiht_a_960106_sm7853.pdf
- iiht_a_960106_sm7850.pdf
- iiht_a_960106_sm7848.pdf
